# Supplementary material
Source: PubMed Central journal article supplement (PMC7774269)
Supplement: ao0c05216_si_001.pdf [file ao0c05216_si_001.pdf]

## Supplementary Information

Biotransformation of 1,8-dihydroxyanthraquinone into peniphenone under the fermentation  
of *Aleurodiscus mirabilis*

Ruifeng Mei, Yaxian Shi, Shengqi Zhang, Juntao Hu, Li Zhu, Junli Gan, Le Cai\*, Zhongtao Ding\*

*School of Life Sciences, Functional Molecules Analysis and Biotransformation Key Laboratory of Universities in Yunnan  
Province, School of Chemical Science and Technology, Yunnan University, Kunming 650091, P. R. China.*

---

E-mail: ztding@ynu.edu.cn (Zhong-Tao Ding)

E-mail: caile@ynu.edu.cn (Le Cai)

# Contents

|                                                                                                                    |     |
|--------------------------------------------------------------------------------------------------------------------|-----|
| <b>Microbiological information for <i>Aleurodiscus mirabilis</i></b> .....                                         | S3  |
| <b>Figure S1.</b> Morphology of <i>Aleurodiscus mirabilis</i> .....                                                | S3  |
| <b>Figure S2.</b> Standard working curve for compound <b>2</b> .....                                               | S4  |
| <b>Figure S3.</b> UV-spectrum for compound <b>2</b> by PDA detector .....                                          | S4  |
| <b>Figure S4.</b> Yields of compound <b>2</b> from different fermentation temperature, pH and time. ....           | S5  |
| <b>Figure S5.</b> <sup>1</sup> H NMR spectrum (400 MHz, MeOD) of compound <b>2</b> .....                           | S6  |
| <b>Figure S6.</b> <sup>13</sup> C NMR spectrum (100 MHz, MeOD) of compound <b>2</b> .....                          | S6  |
| <b>Figure S7.</b> H-H COSY spectrum of compound <b>2</b> .....                                                     | S7  |
| <b>Figure S8.</b> HMBC spectrum of compound <b>2</b> .....                                                         | S7  |
| <b>Figure S9.</b> HSQC spectrum of compound <b>2</b> .....                                                         | S8  |
| <b>Figure S10.</b> <sup>1</sup> H NMR spectrum (400 MHz, DMSO- <i>d</i> <sub>6</sub> ) of compound <b>3</b> .....  | S8  |
| <b>Figure S11.</b> <sup>13</sup> C NMR spectrum (100 MHz, DMSO- <i>d</i> <sub>6</sub> ) of compound <b>3</b> ..... | S9  |
| <b>Figure S12.</b> <sup>1</sup> H NMR spectrum (400 MHz, MeOD) of compound <b>4</b> .....                          | S9  |
| <b>Figure S13.</b> <sup>13</sup> C NMR spectrum (100 MHz, MeOD) of compound <b>4</b> .....                         | S10 |
| <b>Figure S14.</b> H-H COSY spectrum of compound <b>4</b> .....                                                    | S10 |
| <b>Figure S15.</b> HMBC spectrum of compound <b>4</b> .....                                                        | S11 |
| <b>Figure S16.</b> HSQC spectrum of compound <b>4</b> .....                                                        | S11 |
| <b>Figure S17.</b> ESI-MS of compound <b>2</b> .....                                                               | S12 |
| <b>Figure S18.</b> ESI-MS of compound <b>3</b> .....                                                               | S13 |
| <b>Figure S19.</b> ESI-MS of compound <b>4</b> .....                                                               | S14 |
| <b>Figure S20.</b> ESI-MS of compound <b>5</b> .....                                                               | S15 |
| <b>Figure S21.</b> ESI-MS of compound <b>6</b> .....                                                               | S16 |

Microbiological information for *Aleurodiscus mirabilis*

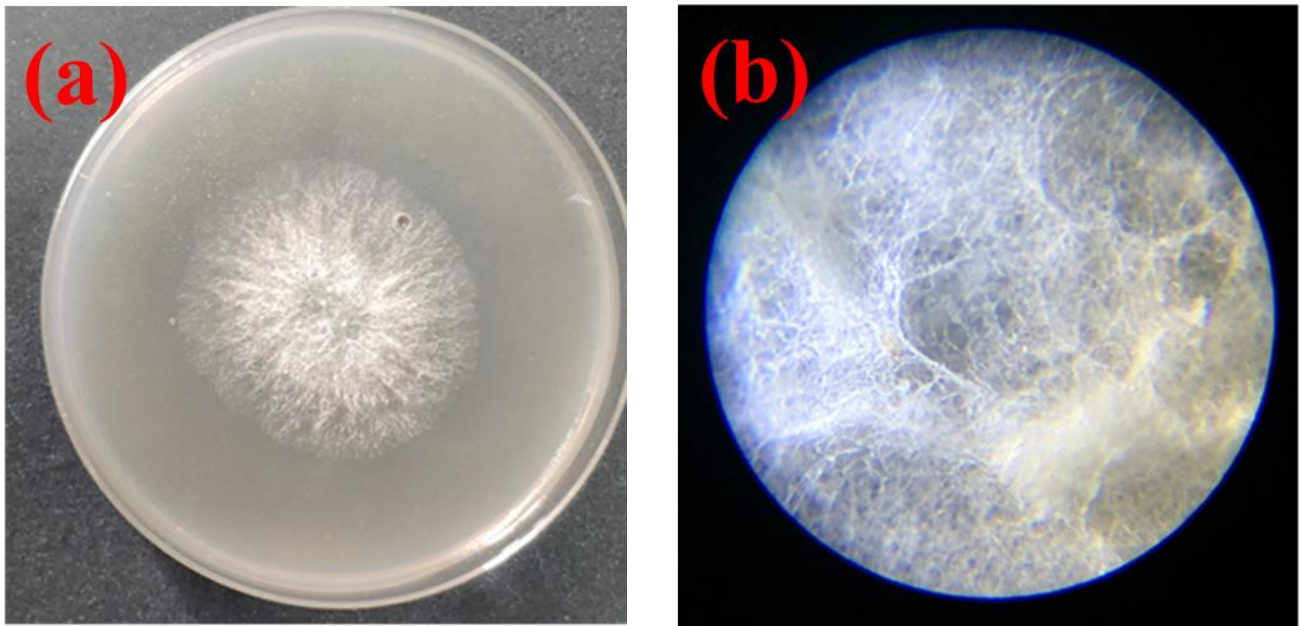

**Figure S1.** Morphology of *Aleurodiscus mirabilis* (Figure S1a) and under a 20-fold microscope (Figure S1b)  
(The figures were taken by one of the authors)

ITS1:

```
GCGGACGCTGTCGCTGGTCGCTCCGGGGGGTGTGCCGCCTCTCCGCCACCCCAACCCATGCAC
CTGTGGACCTTTGCGTGGGTCTGGACCCTTAAAACGGATCTCCCGCGTCCCTTTACATCAAACCC
ATGCCCTTCGTAATGTATGACATTGATGTCTTAAAACCTCATCAAGTACTGCTTTGAGCAACGGATC
TCTTGGCTCTCGCATGGATGAAGAACTCTCCTAAATGCTATAAGAATTGCGAATTGCAAATTCC
GTGAATCATCTAATCTTTGAACGCACCTTGCGCCCTTTGGTGTTCGGAAGGGGCACACCTGTTTGA
GTGTCTTGAAATTCTCAACCCTCCCCCTTTGTTGTGATGGTGGGGAGGGCTTGGACTTGAACGTT
CTTGCATGGCTTTTGCTCCGCTCCTCCCTCCCGCATTAGGATGTGTTCGTTGTGACGGTACCTTTTG
GTGTGACAGATATCTACGGCGGGGGGCTACGCTGTGAATGCTTCGAGGGCGGGCTCGCTACCG
TCGCCCCCTTGTGGCGACAAATCTATGAGACCTGACCTCAGATCATGCGTC
```

ITS4:

```
TATGTCTATTTTCGAAGGGTTGCTCCCAAAGGGCGGGACGGTTGTGAGACGGGCTCTTTTTTTTT
CTCAACGACTACCCCCAGCGCATAGTTCTACCCACCAAAGGGCCGCGCCTCAGGGTACTCT
AATGTATTTGACCGGACCATAGCAAAGCCCTGCCTTAACCTCCCCGTCCACCCTTGCCACCT
TCACGACGAAGGGGGAGGGGTGAAAATTCACGACCCTCGAACAGGGCGGGCCCTTCGGAATAC
CAAAGGGTGCAAGGTGCGTTTCAAGATTCCATGATTCATGATTTCTGCAATTTCTTTACTTATCG
CATTTTTTAGCGTTCTTATAGATGCTGCAGCCGTCGATCCGTTGTTGAAAATAGATTGGATGTTGT
TTGATACATCACTGTGTTACATTCTGCGACATGCGTTTGTGTAAGGGACGCGCTCCAATCTGGTT
TTTACCTCCCGATCCCCGGGCGGGTGGTTTGTTCATGGCTTGGCTACCGGGGTAAAGGCTTG
CACATGCCACCGTACCGGCCTGCTACCACCTCATCCCCGTTGCTGGTTCC
```

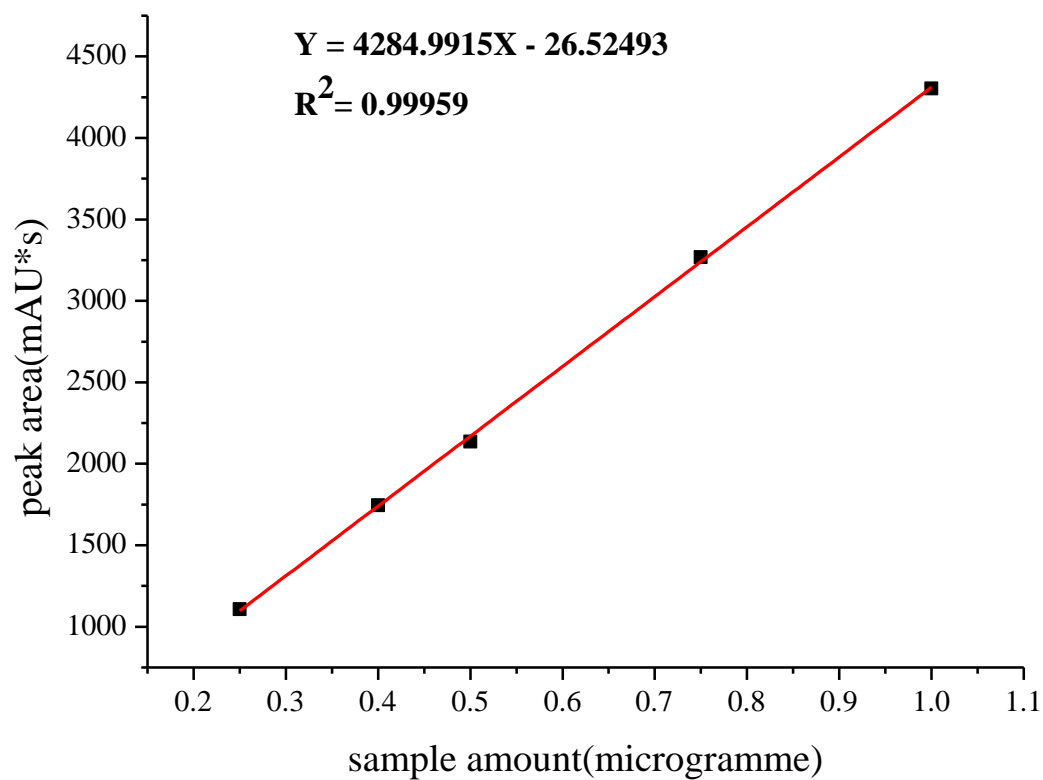

**Figure S2.** Standard working curve for compound **2**

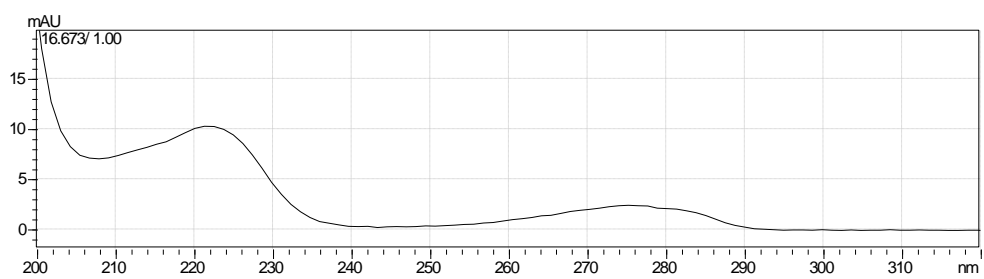

**Figure S3.** UV-spectrum for compound **2** by PDA detector

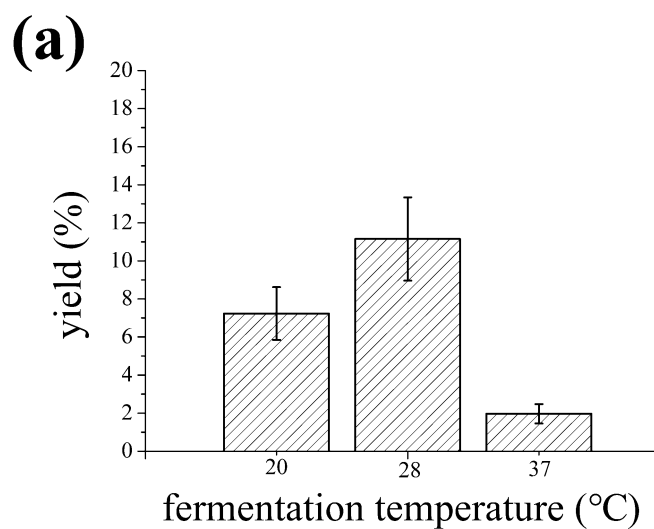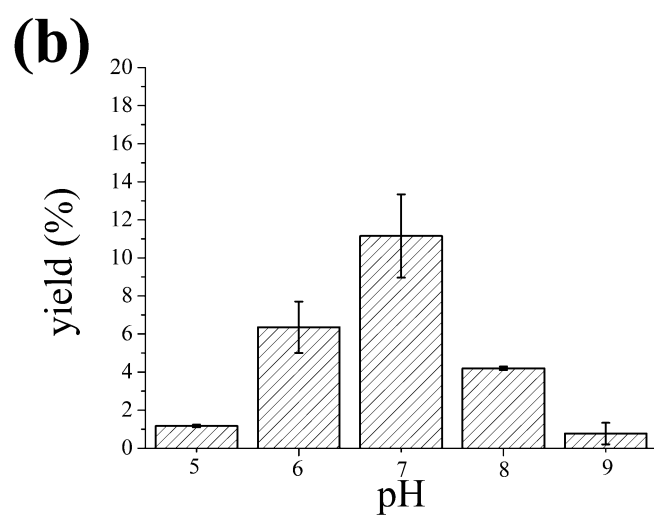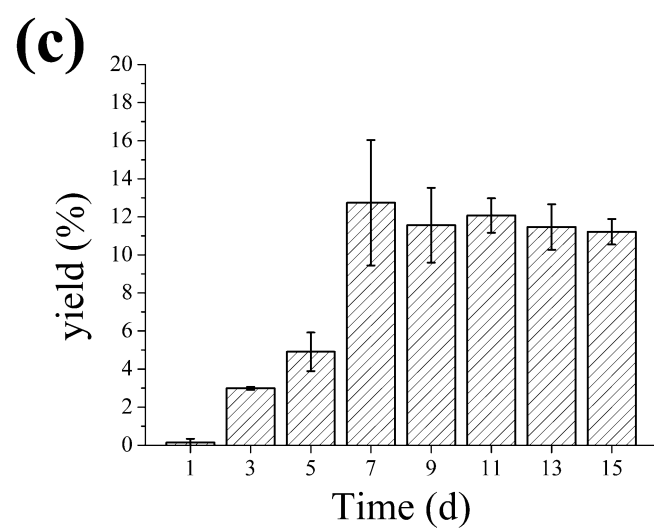

**Figure S4.** Yields of compound **2** from different fermentation temperature (Figure S4a), fermentation pH (Figure S4b) and fermentation time (Figure S4c).

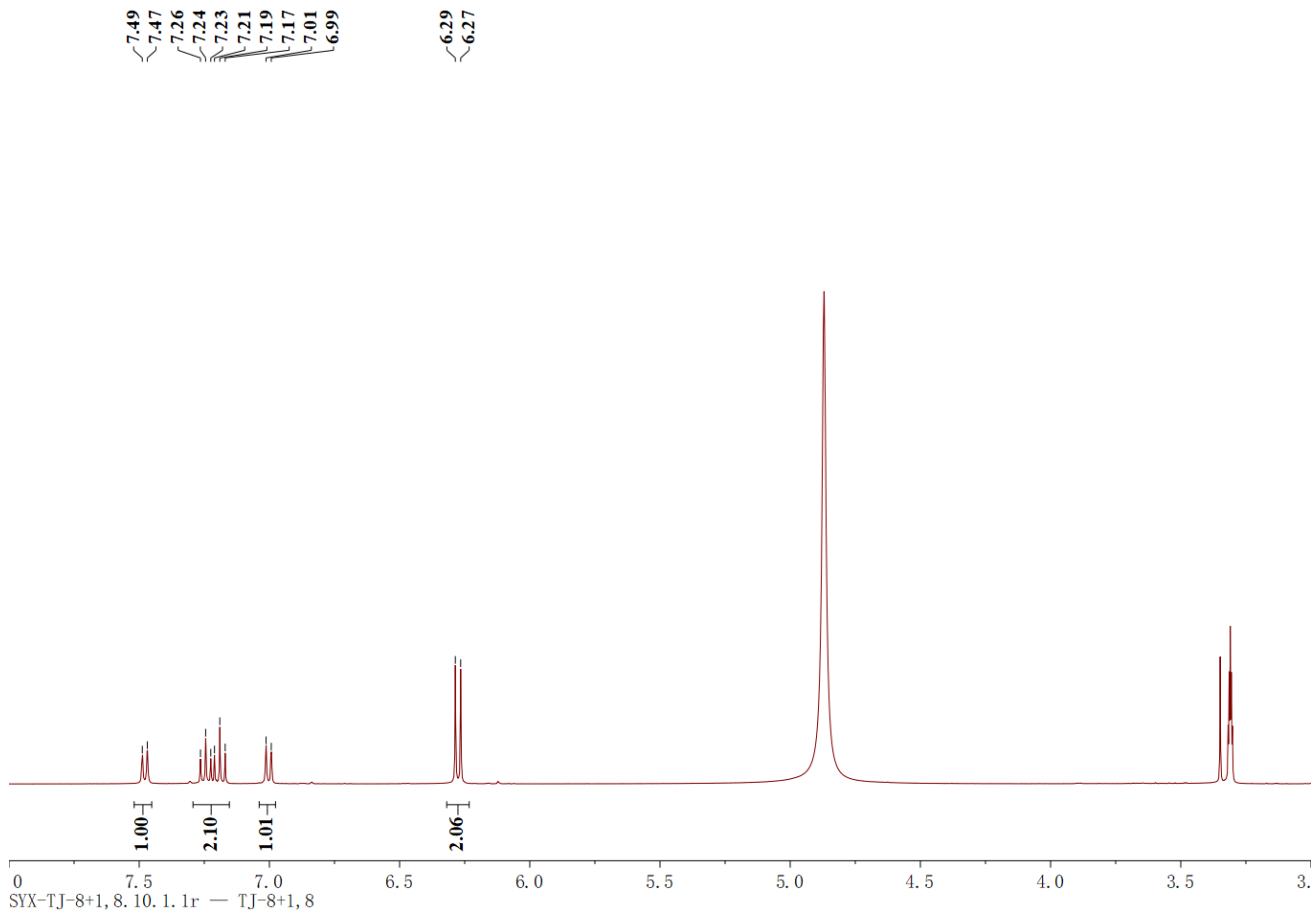

**Figure S5.**  $^1\text{H}$  NMR spectrum (400 MHz, MeOD) of compound **2**

**Dept 90**

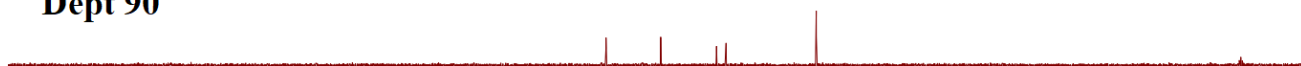

**Dept 135**

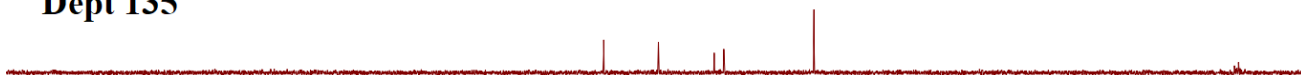

$^{13}\text{C}$

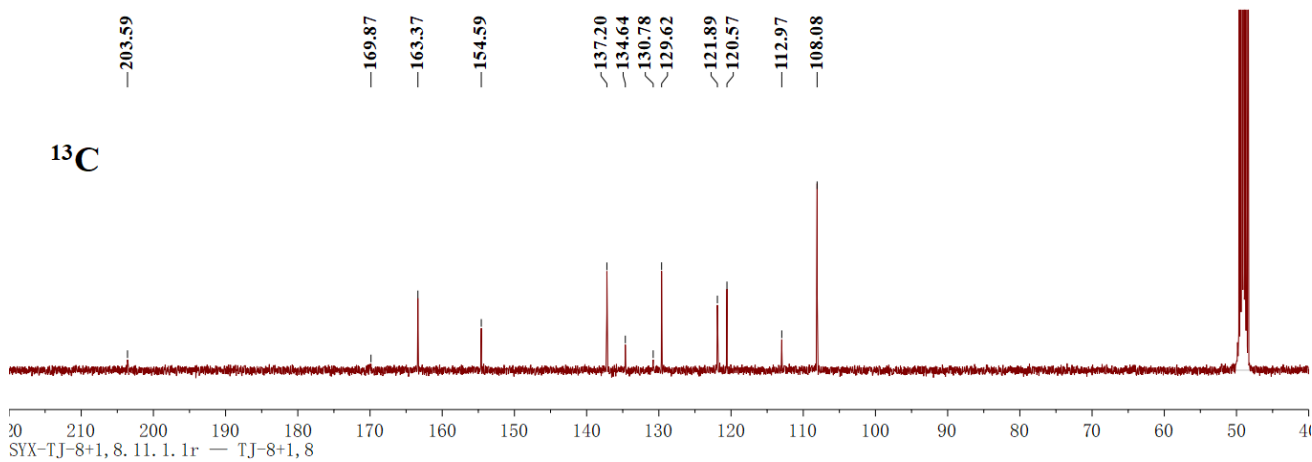

**Figure S6.**  $^{13}\text{C}$  NMR spectrum (100 MHz, MeOD) of compound **2**

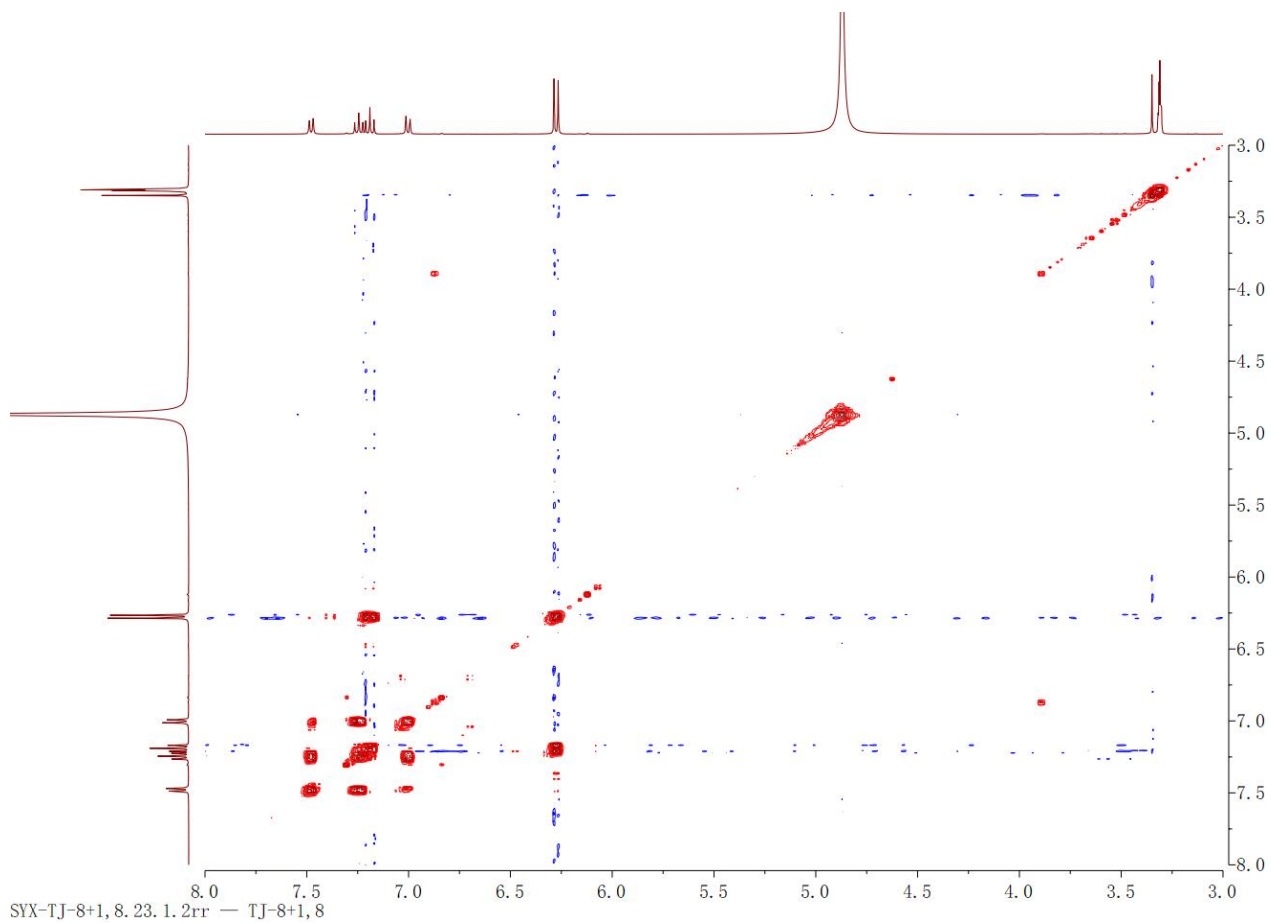

**Figure S7.** H-H COSY spectrum of compound **2**

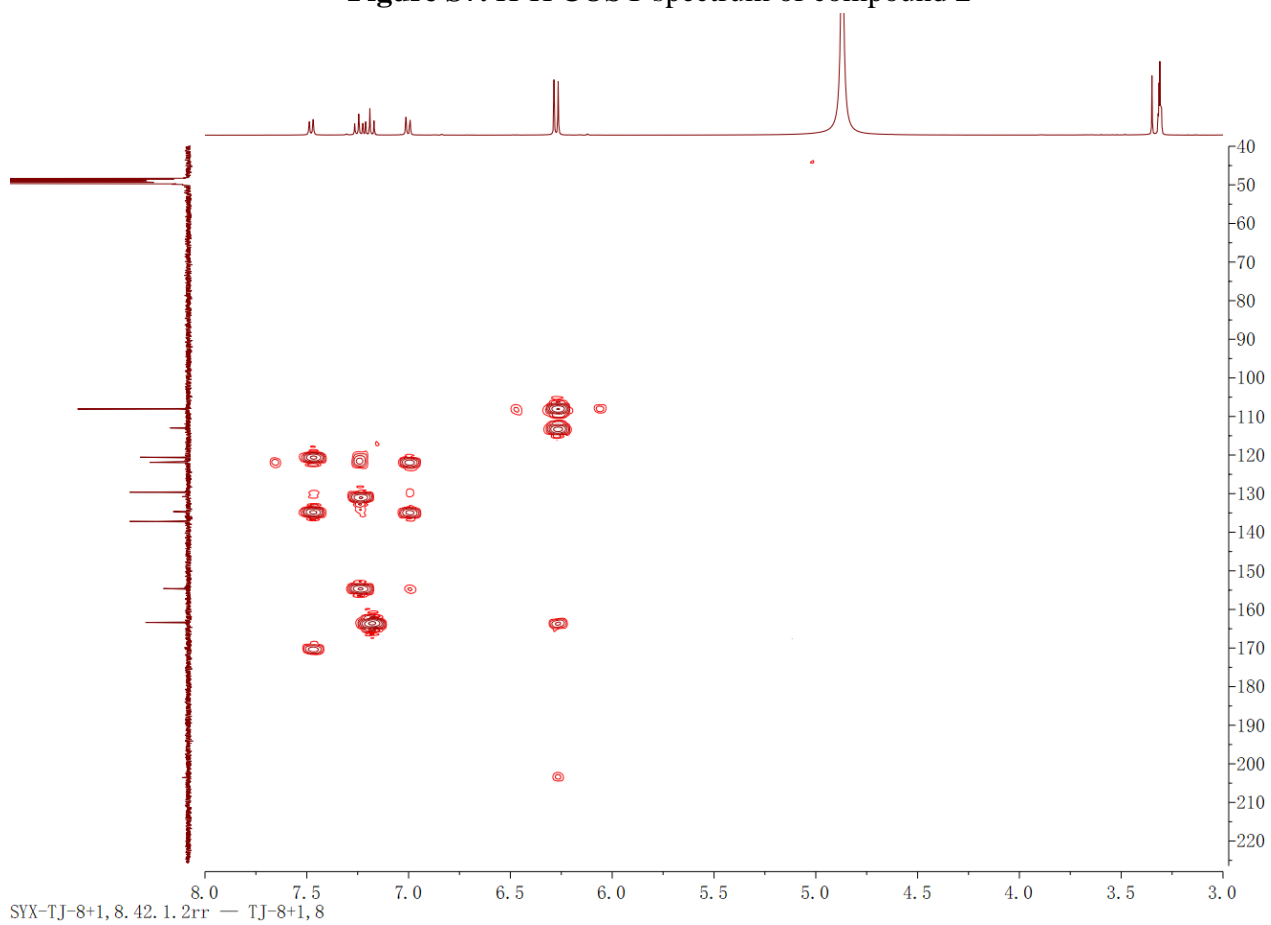

**Figure S8.** HMBC spectrum of compound **2**

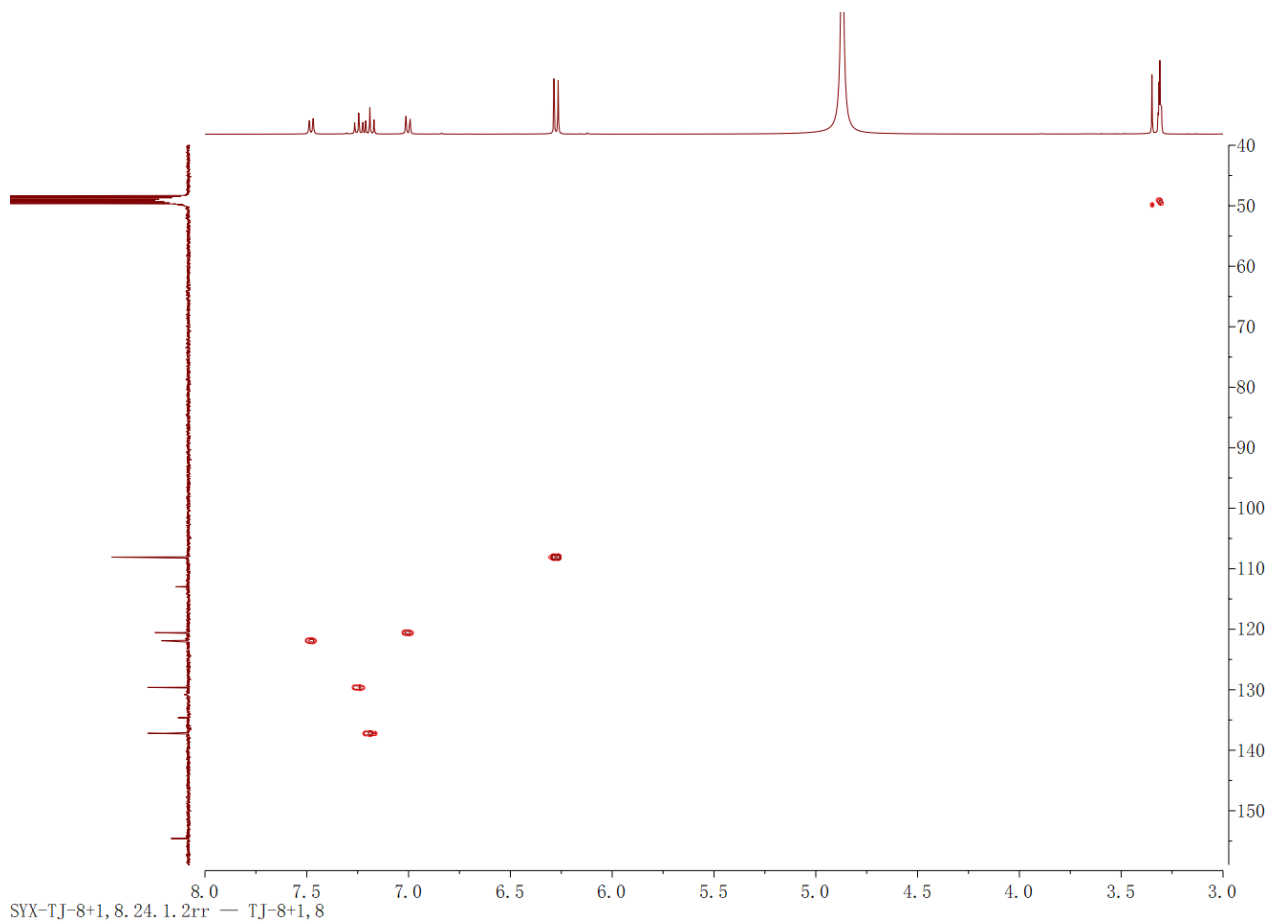

**Figure S9.** HSQC spectrum of compound **2**

12.02  
11.95

7.40  
7.09  
7.05  
6.54

2.37

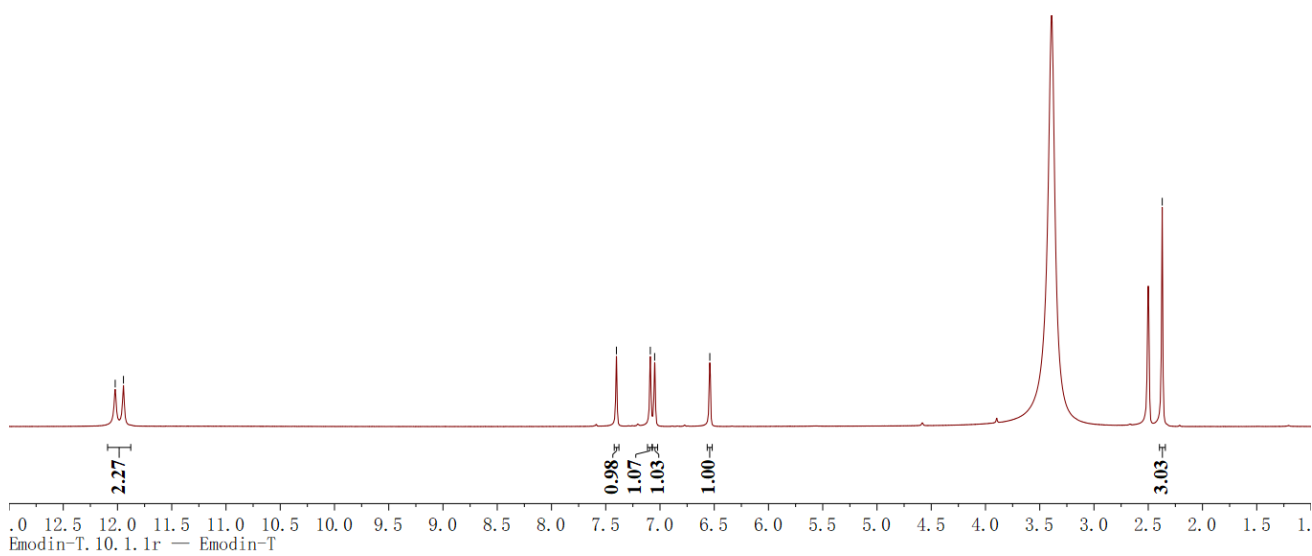

**Figure S10.**  $^1\text{H}$  NMR spectrum (400 MHz,  $\text{DMSO-}d_6$ ) of compound **3**



Dept 90

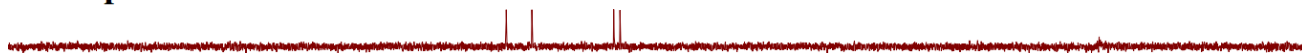

Dept 135

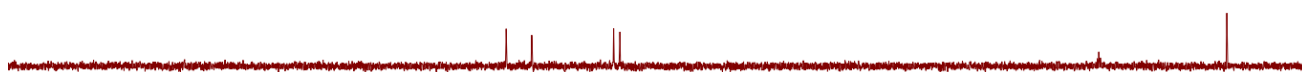

—189.63  
—181.25  
~165.60  
~164.46  
~161.42  
—148.23  
~135.02  
~132.71  
—124.10  
—120.45  
~113.27  
~108.87  
~108.81  
~107.92  
—21.55

$^{13}\text{C}$

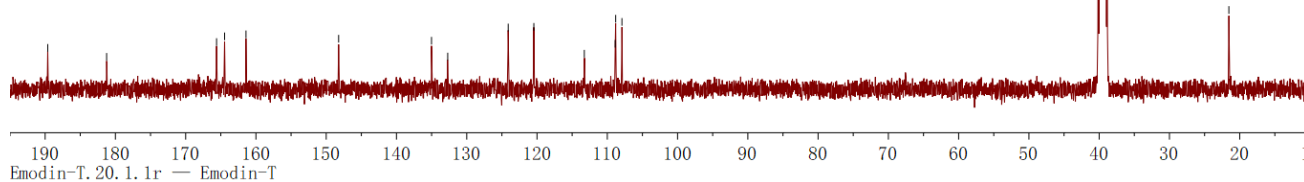

Emodin-T. 20. 1. 1r — Emodin-T

Figure S11.  $^{13}\text{C}$  NMR spectrum (100 MHz,  $\text{DMSO}-d_6$ ) of compound 3

~7.29  
~7.21  
~7.19  
~7.16  
—6.82  
~6.29  
~6.27  
—2.33

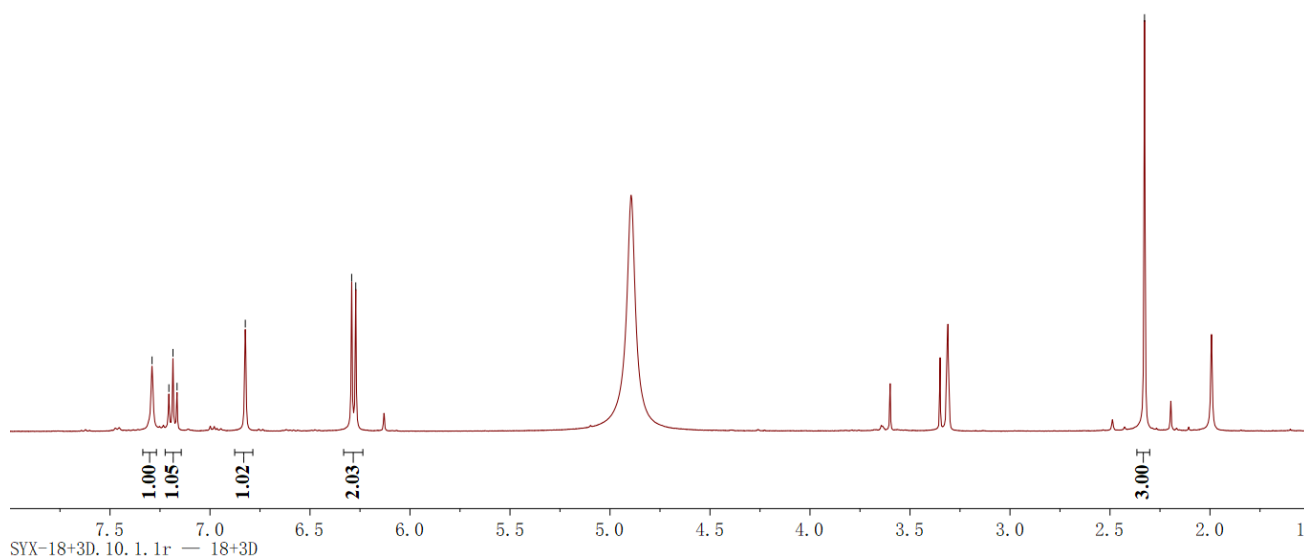

SYX-18+3D. 10. 1. 1r — 18+3D

Figure S12.  $^1\text{H}$  NMR spectrum (400 MHz, MeOD) of compound 4

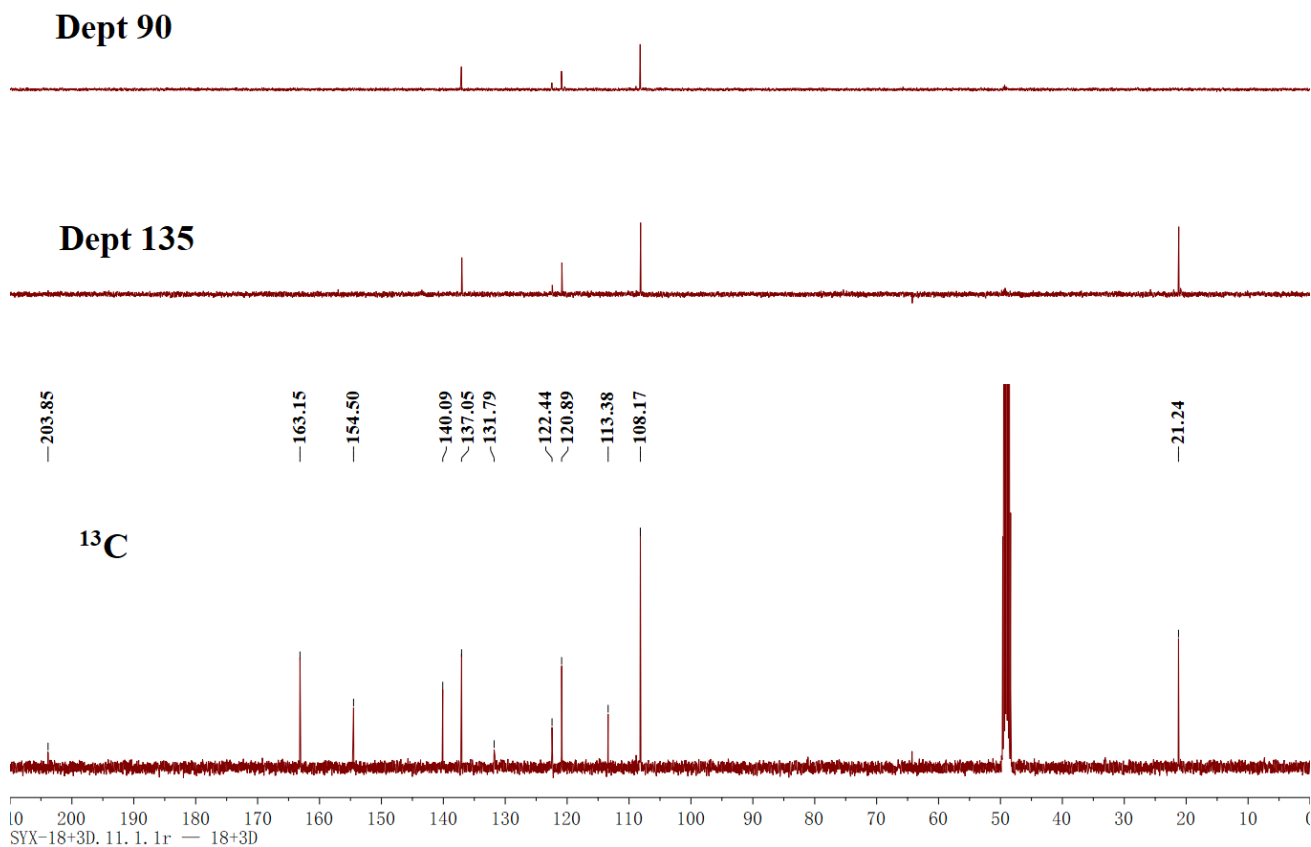

**Figure S13.**  $^{13}\text{C}$  NMR spectrum (100 MHz, MeOD) of compound **4**

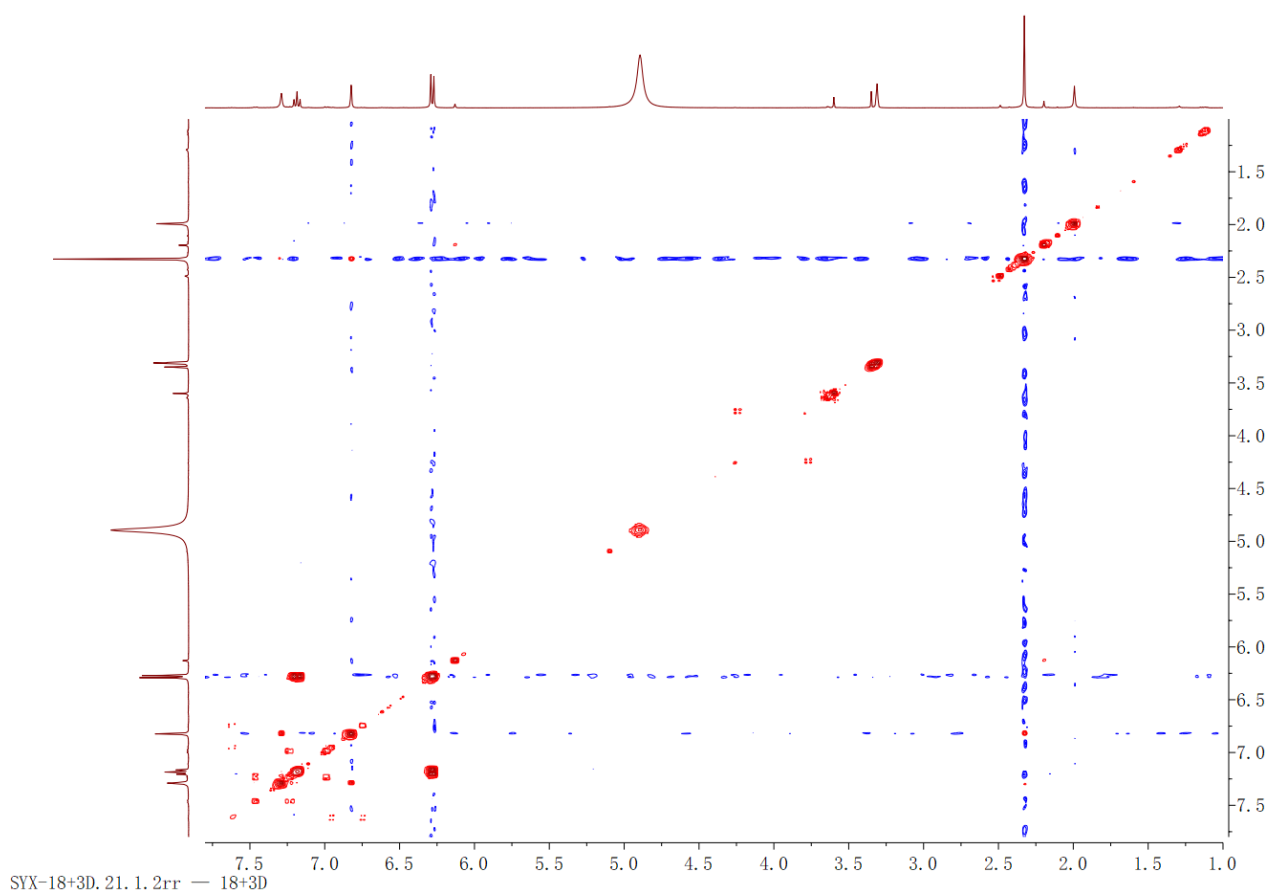

**Figure S14.** H-H COSY spectrum of compound **4**

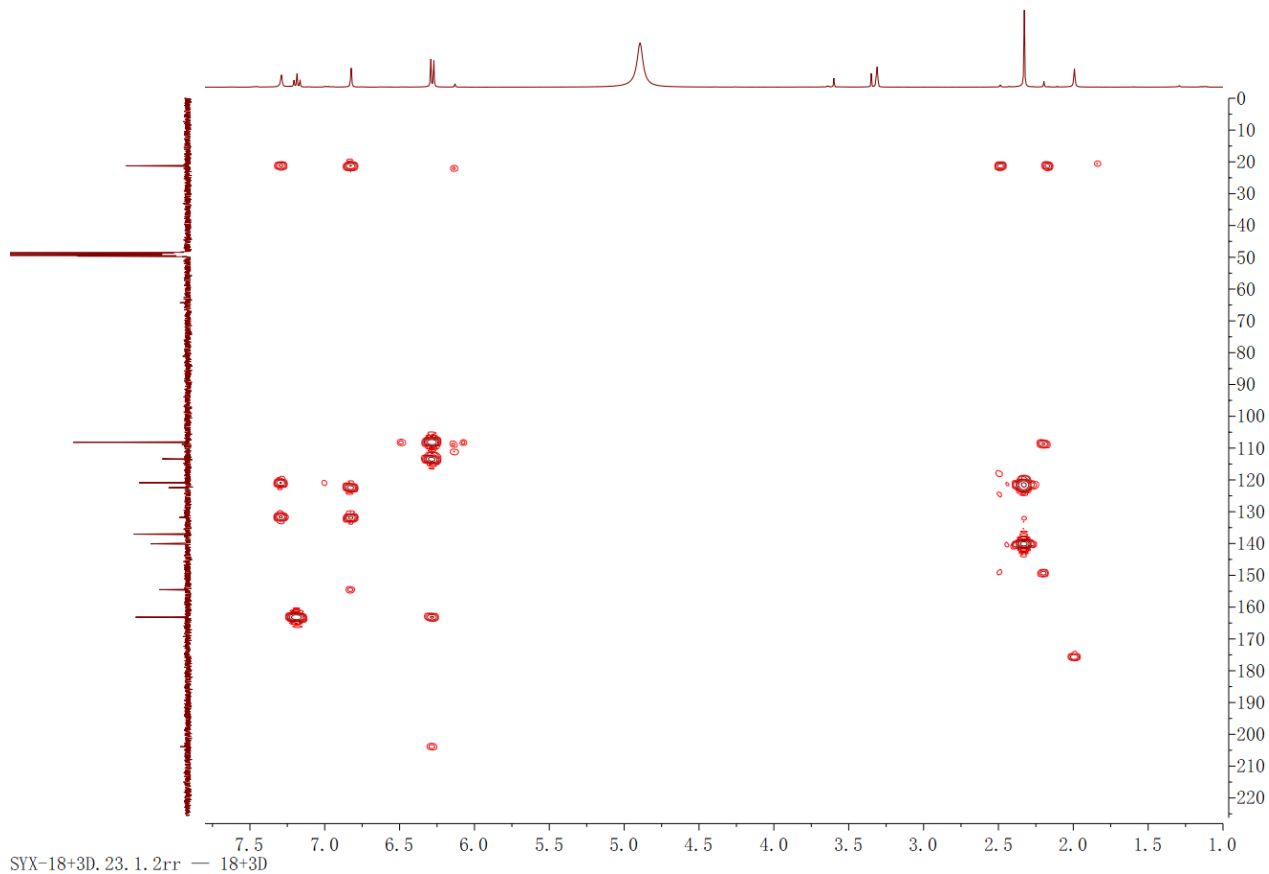

**Figure S15.** HMBC spectrum of compound **4**

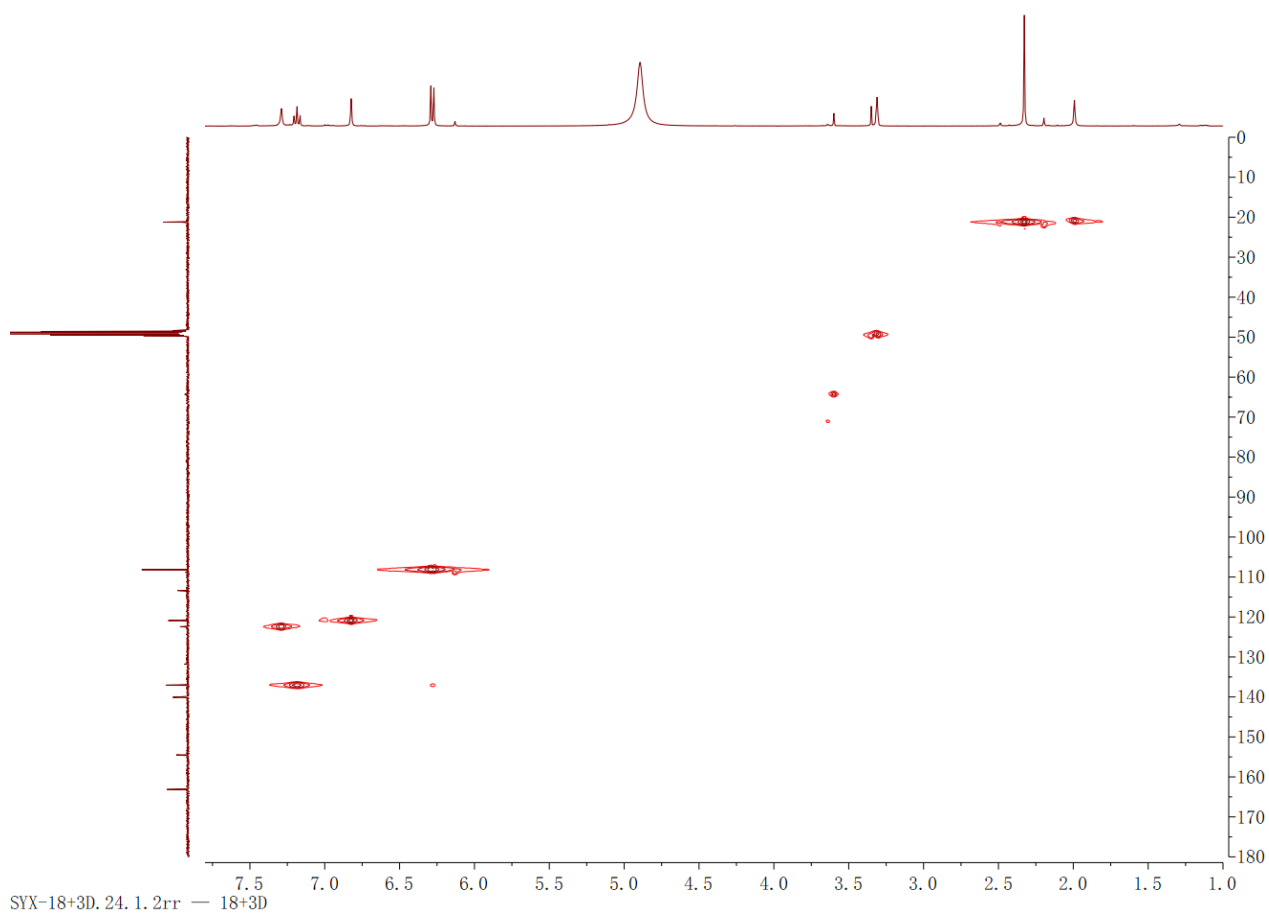

**Figure S16.** HSQC spectrum of compound **4**

mrf-4 #56 RT: 0.88 AV: 1 NL: 8.48E6  
T: FTMS + c ESI Full ms [100.00-1000.00]

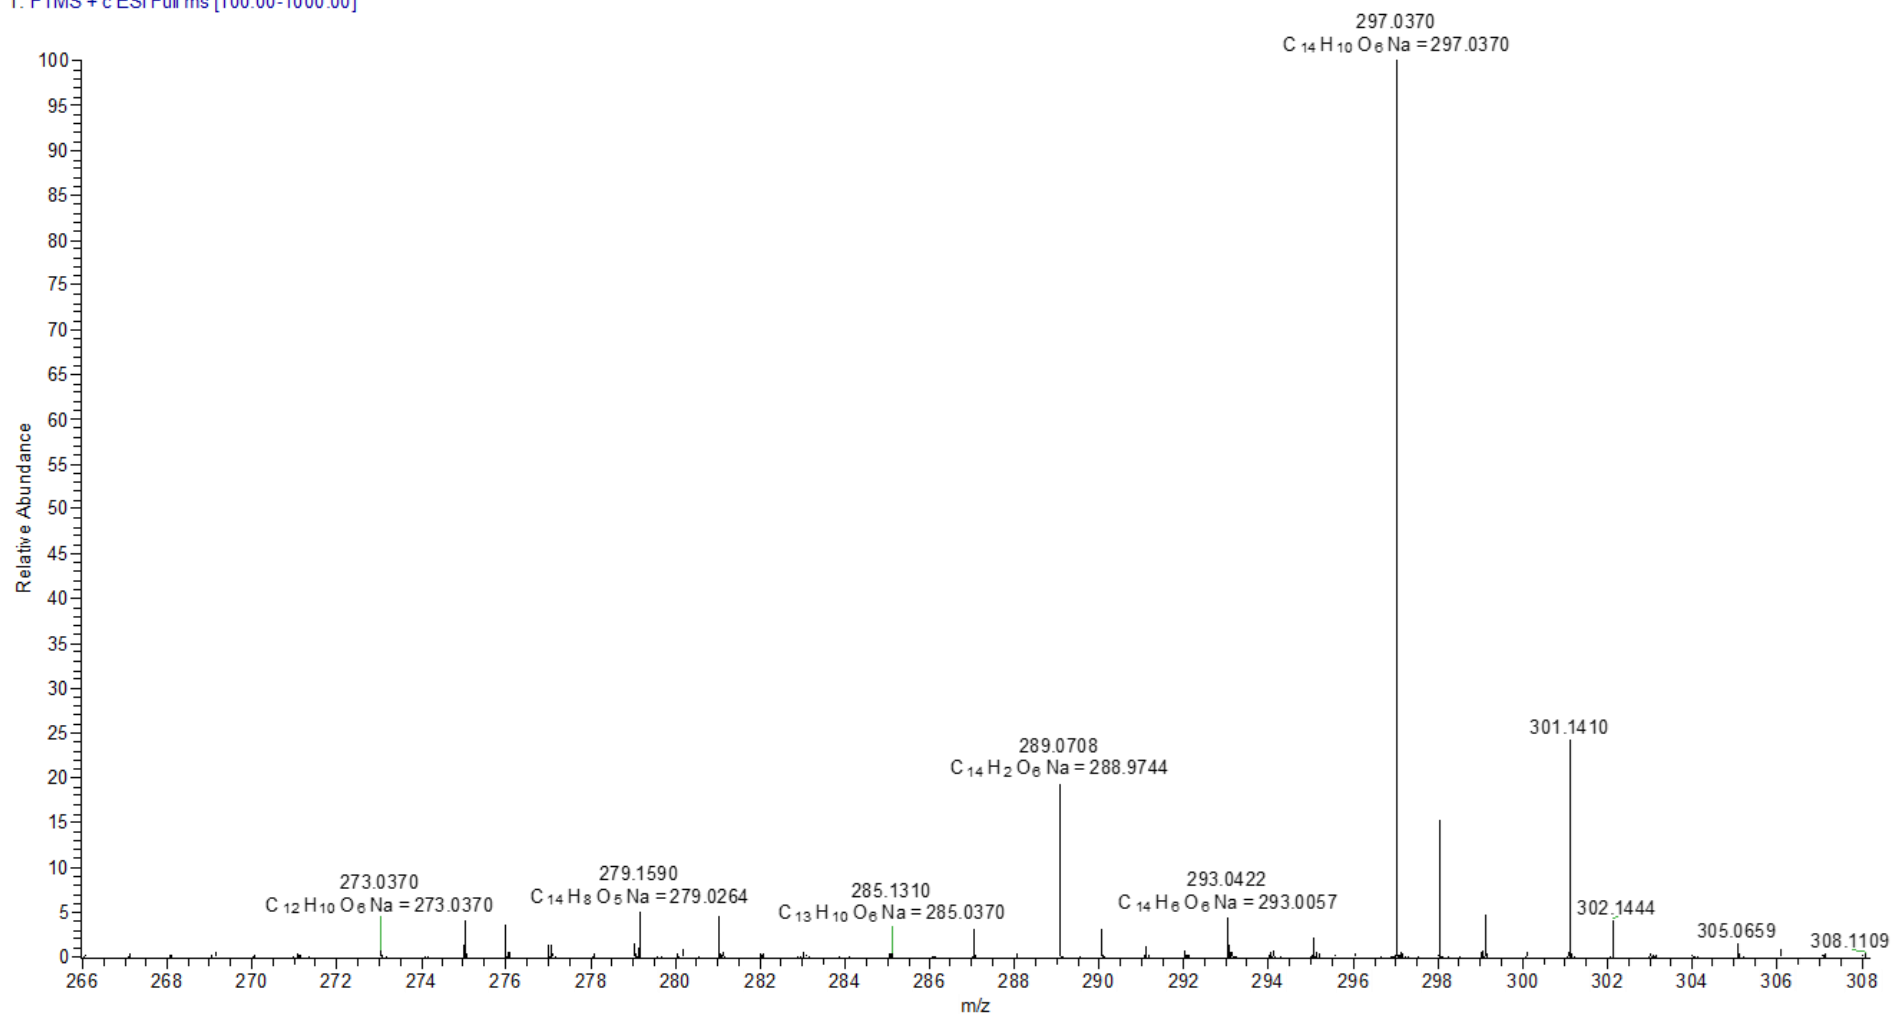

Figure S17. ESI-MS of compound 2

ij-8-72-h2c #51 RT: 0.99 AV: 1 NL: 6.46E3  
T: FTMS + c ESI Full ms [50.00-1200.00]

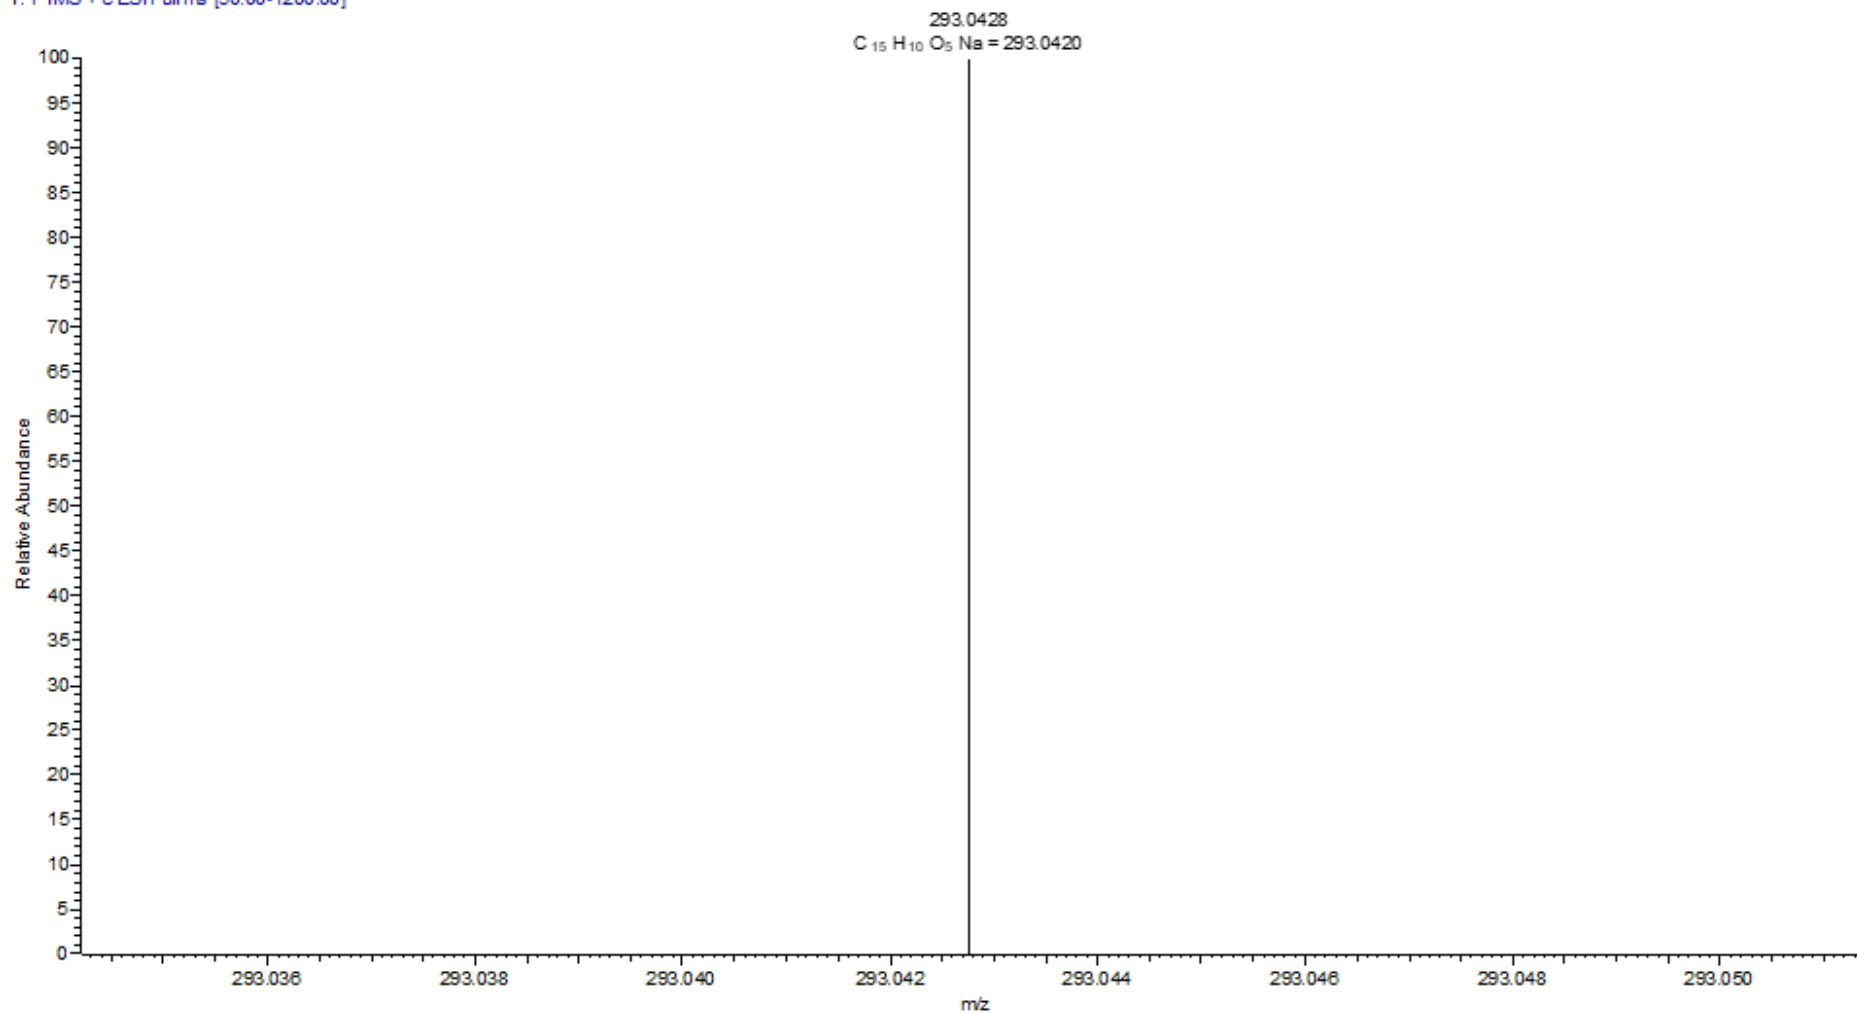

**Figure S18.** ESI-MS of compound **3**

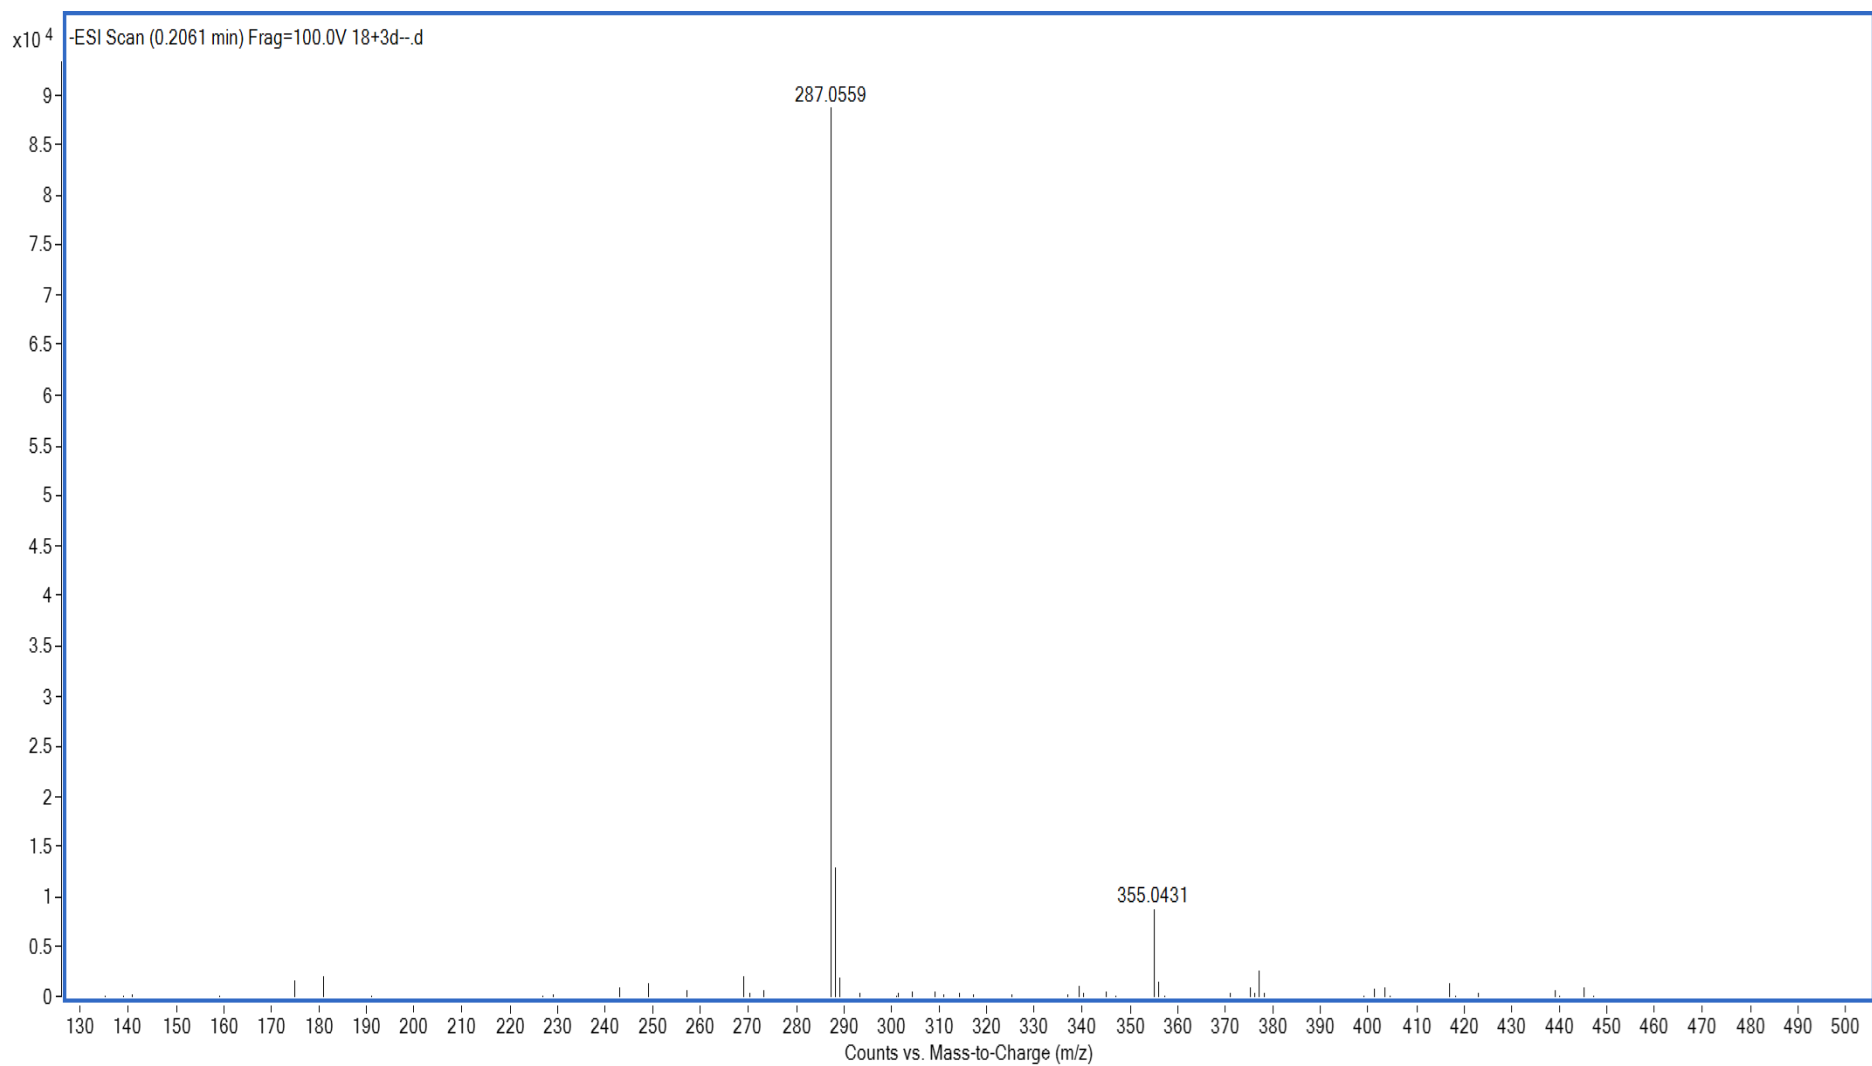

**Figure S19.** ESI-MS of compound **4**

mf-3 #57 RT: 0.90 AV: 1 NL: 1.31E5  
T: FTMS + c ESI Full ms [100.00-1000.00]

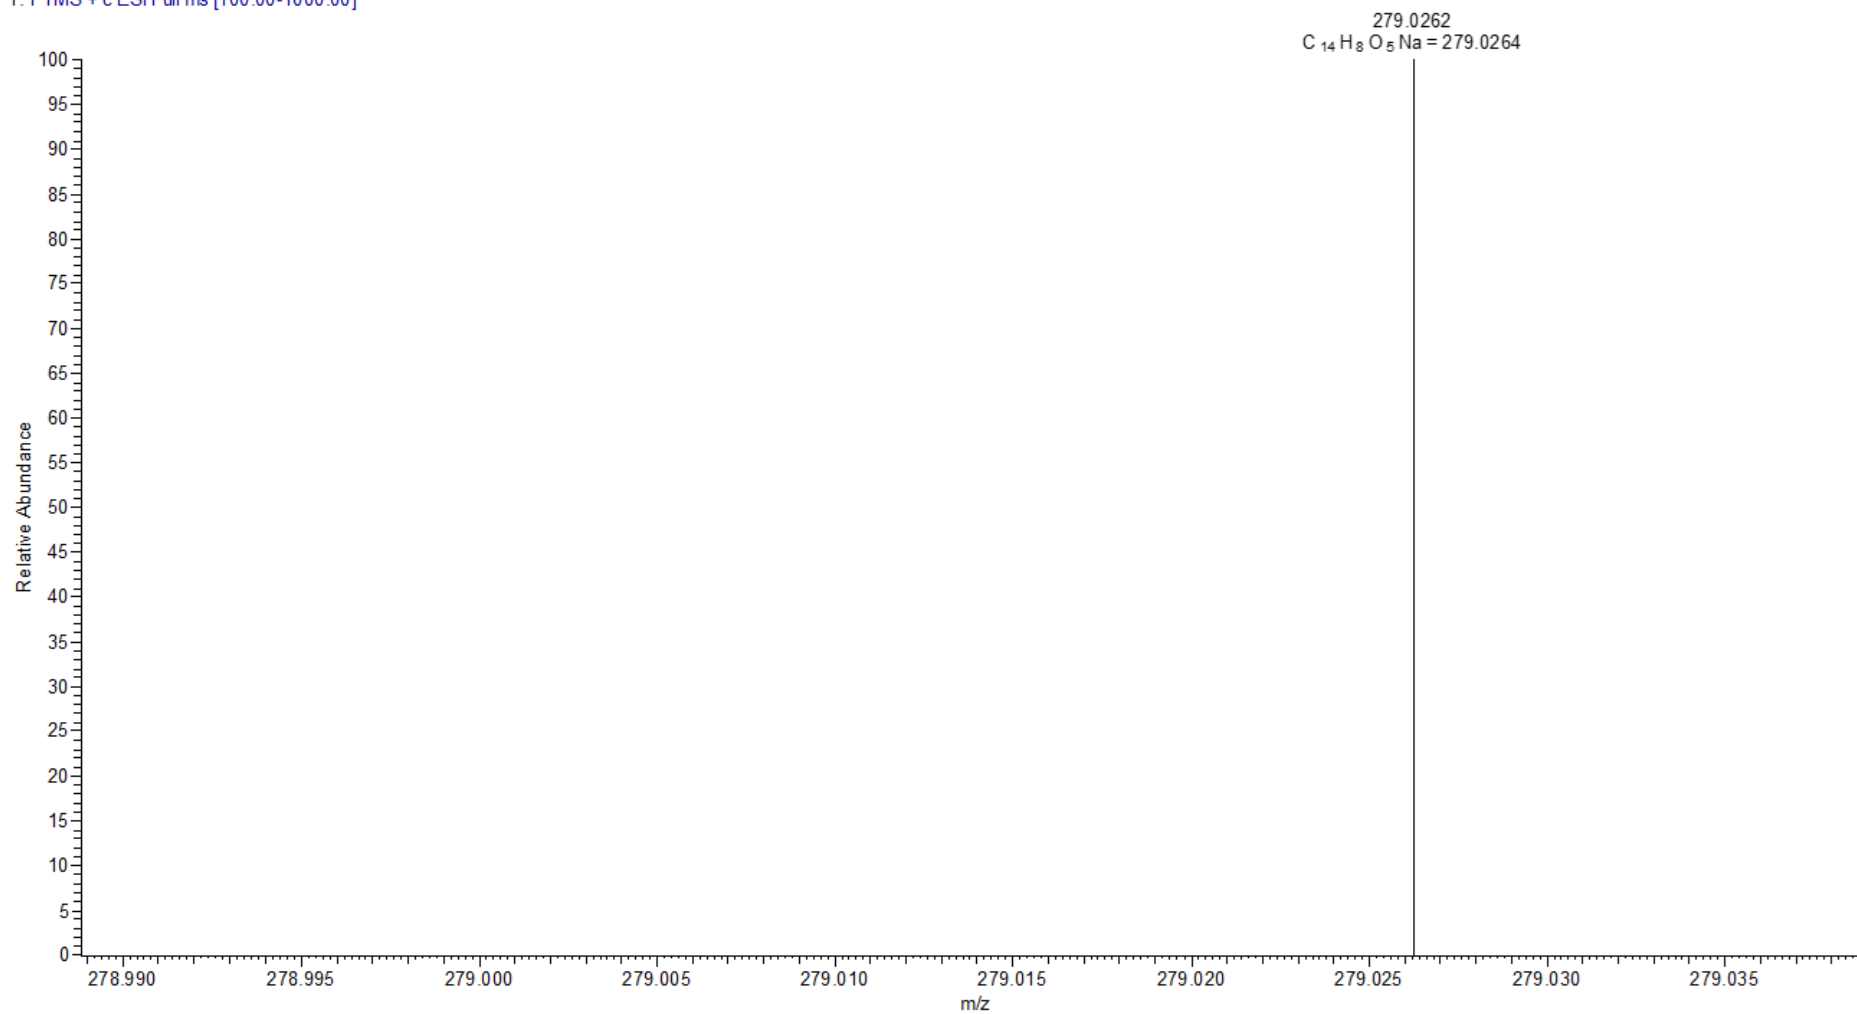

**Figure S20.** ESI-MS of compound **5**

mrf-3 #51 RT: 0.81 AV: 1 NL: 3.83E4  
T: FTMS + c ESI Full ms [100.00-1000.00]

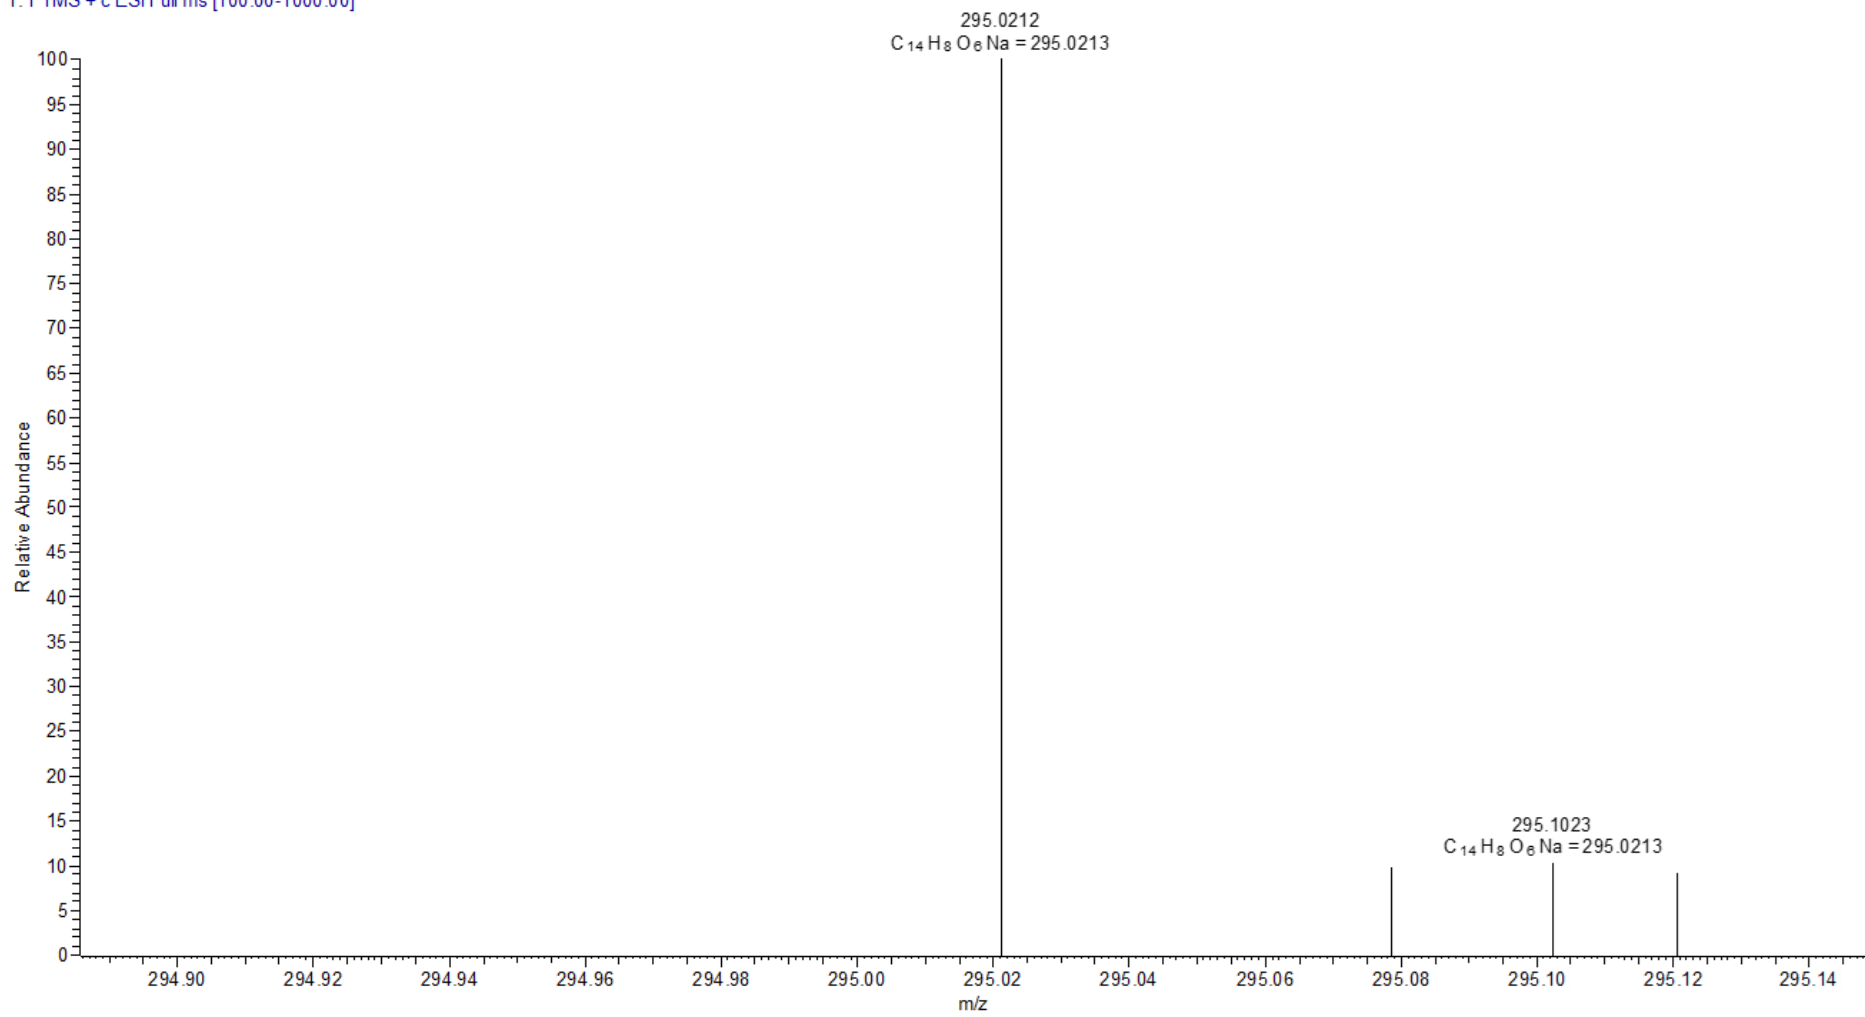

**Figure S21.** ESI-MS of compound **6**
